# Supplementary material for: Coupling a rotating biological contactor with an anaerobic baffled reactor for sustainable energy recovery from domestic wastewater
Source: Royal Society of Chemistry journal article supplement (doi:10.1039/d2ew00260d), 2022-01-01
Supplement: d2ew00260d1.pdf [file d2ew00260d1.pdf]

**Supporting Information (SI) for:**

**Coupling a Rotating Biological Contactor with an Anaerobic Baffled  
Reactor for Sustainable Energy Recovery from Domestic  
Wastewater**

Authors: Mona Mohammed<sup>a,b</sup>, Deborah L. Sills<sup>b,§</sup>,

(a) Independent WASH consultant, Sana'a, Yemen (Current Address)

(b) Department of Civil and Environmental Engineering, 215 Dana Engineering, Bucknell  
University, Lewisburg, PA 17837, United States

<sup>§</sup>Corresponding author [deborah.sills@bucknell.edu](mailto:deborah.sills@bucknell.edu), ph: (607) 277 5609

## Contents

|    |                                                              |    |
|----|--------------------------------------------------------------|----|
| A. | Summary of Rotating Biological Contactor Design process..... | 3  |
| B. | Labortory study .....                                        | 5  |
|    | B1. Synthetic Wastewater .....                               | 5  |
|    | B2. Henry's Constant .....                                   | 6  |
|    | B3. Tracer Test .....                                        | 6  |
| C. | Engineering Process Model.....                               | 9  |
|    | C1. Process flow of Model Scenarios .....                    | 9  |
|    | C2. Building the Process Engineering Models.....             | 11 |
|    | C3. Normalization Factors .....                              | 13 |
|    | C4. Uncertainty Analysis .....                               | 13 |
|    | C5. Technoeconomic analysis .....                            | 14 |
| D. | Supplementary Results .....                                  | 17 |
|    | D1. Recipe H Midpoints .....                                 | 17 |
|    | D2. Capital and Operating Costs .....                        | 20 |
| E. | Bibliography .....                                           | 21 |

## A. Summary of Rotating Biological Contactor Design process

Design parameters for the RBC were based on criteria outlined in Grady et al. (2011).<sup>1</sup> The reactor was designed to accommodate a flowrate of ~30 L/day, hydraulic loading rate of 0.08 to 0.16 m<sup>3</sup>/m<sup>2</sup> day with influent BOD<sub>5</sub> concentration of 200 mg/L. To ensure sufficient oxygen transfer, the RBC was designed with a surface organic loading of 12 to 20 g of SBOD/m<sup>2</sup> day (20-35 g SCOD) for each chamber. The first two stages were designed to remove carbonaceous biological oxygen demand (BOD). The third stage was designed to remove nitrogenous BOD, as carbonaceous BOD concentrations were estimated to be below 20 mg /L in the third stage. A more detailed description of the lab-scale RBC is presented in Table A.1.

Table A.1 Lab-scale rotating biological contactor parameters

| Parameter                       | Baffle region | First and<br>Second Stage | Third Stage |
|---------------------------------|---------------|---------------------------|-------------|
| Disk Diameter (m)               | N/A           | 0.2                       | 0.23        |
| Number of Disks                 | 0             | 8                         | 8           |
| Area of disks (m <sup>2</sup> ) | 0             | 0.065                     | 0.085       |
| Length of Stage (m)             | 0.018         | 0.24                      | 0.277       |
| Width of Stage (m)              | 0.256         | 0.256                     | 0.256       |
| Depth of Stage (m)              | 0.297         | 0.297                     | 0.297       |
| Over baffle height (m)          | 0.128         | 0.128                     | 0.129       |
| Volume (L)                      | 1.37          | 18.25                     | 21.06       |
| Liquid Volume (L)               | 0.59          | 7.86                      | 9.15        |
| HRT (day)                       | 0.02          | 0.24                      | 0.28        |

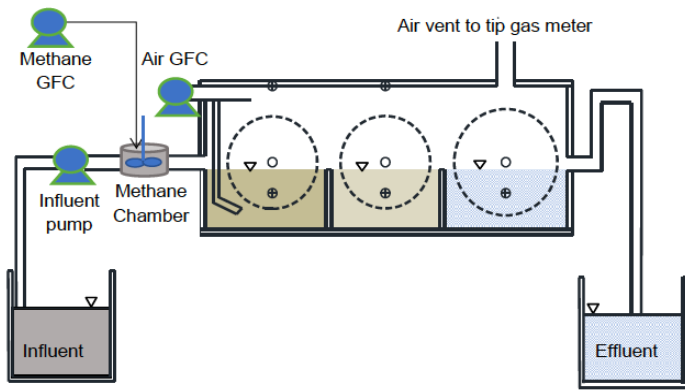

(a)

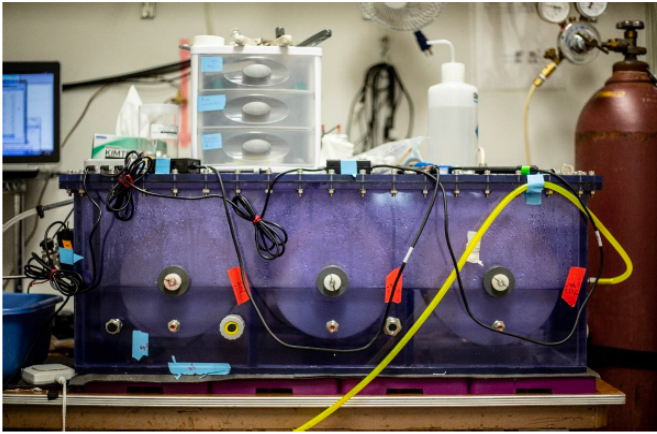

(b)

Supplementary Figure A.1 (a) Laboratory-scale rotating biological contactor (RBC) ( $V = 17.6$  L). Synthetic feed was sparged with methane gas using a gas flow controller (GFC) in the methanation chamber. Air was supplied to the closed reactor using a GFC, and air flow out of the reactor was measured with a precision wet tip gas meter. (b) Image of reactor

## B. Labortory study

### B1. Synthetic Wastewater

The synthetic wastewater used in this study (Table B.1) simulated anaerobic effluent from anaerobic treatment of domestic sewage.<sup>2,3</sup> A half strength wastewater (recipe in Table B.1 diluted by 2) was used during the start-up period.

Table B.1 Composition of influent synthetic wastewater in mg/L.

| Chemical Formula (Manufacturer, Location)                                                      | Concentration in Feed (mg/L) |
|------------------------------------------------------------------------------------------------|------------------------------|
| KH <sub>2</sub> PO <sub>4</sub> (Acros Organics, NJ, USA)                                      | 11                           |
| CaCl <sub>2</sub> ·2H <sub>2</sub> O (Fisher Chemicals, Fair Lawn, NJ)                         | 5                            |
| MgCl <sub>2</sub> ·6H <sub>2</sub> O (VWR, West Chester, PA)                                   | 33                           |
| KCl (End Chemicals, Gibbstown, NJ)                                                             | 16                           |
| NH <sub>4</sub> Cl (Beantown Chemicals, Hudson, NH)                                            | 150                          |
| Na <sub>2</sub> S·2H <sub>2</sub> O (Alfa Aesar, Ward Hill, MA)                                | 59.5                         |
| C <sub>3</sub> H <sub>5</sub> NaO <sub>2</sub> (Spectrum Chemical MFG CORP, New Brunswick, NJ) | 116.643                      |
| CH <sub>3</sub> COONa·H <sub>2</sub> O (Amersco, Solon, OH)                                    | 44.336                       |
| Ensure (Abbott, Chicago, IL)                                                                   | 8.036                        |
| FeSO <sub>4</sub> ·7H <sub>2</sub> O (Fisher Chemicals, Fair Lawn, NJ)                         | 5.49                         |
| CoCl <sub>2</sub> ·6H <sub>2</sub> O (Fisher Chemicals, Fair Lawn, NJ)                         | 1.70x10 <sup>-1</sup>        |
| ZnSO <sub>4</sub> ·7H <sub>2</sub> O (Amersco, Solon, OH)                                      | 2.50 x10 <sup>-2</sup>       |
| H <sub>3</sub> BO <sub>3</sub> (Fisher Chemicals, Fair Lawn, NJ)                               | 6.00 x10 <sup>-2</sup>       |
| MnCl <sub>2</sub> ·4H <sub>2</sub> O (Fisher Chemicals, Fair Lawn, NJ)                         | 4.00 x10 <sup>-2</sup>       |
| CuCl <sub>2</sub> ·2H <sub>2</sub> O (Ward's Science Rochester, NY)                            | 2.70 x10 <sup>-2</sup>       |
| Na <sub>2</sub> MoO <sub>4</sub> ·2H <sub>2</sub> O (Fisher Chemicals, Fair Lawn, NJ)          | 2.50 x10 <sup>-2</sup>       |
| Al <sub>2</sub> (SO <sub>4</sub> ) <sub>3</sub> (Fisher Chemicals, Fair Lawn, NJ)              | 1.67 x10 <sup>-2</sup>       |
| NiCl <sub>2</sub> ·6H <sub>2</sub> O (Fisher Chemicals, Fair Lawn, NJ)                         | 2.40 x10 <sup>-2</sup>       |
| Na <sub>2</sub> SeO <sub>4</sub> (VWR, West Chester, PA)                                       | 1.70 x10 <sup>-3</sup>       |

## B2. Henry's Constant

A dimensionless Henry's Law constant was calculated using Equations (B1) and (B2) for a temperature of 20°C :

$$\text{Log}K_H(\text{atm}) = -\frac{675.74}{T(K)} + 6.88 \quad (\text{B1})$$

Where  $K_H$  is Henry's constant [atm] at temperature T [K], 675.74 and 6.88 are constants (provided by Tchobanoglous, 2003)

$$K_{H,T} \left( \frac{\text{mole/L(aq)}}{\text{mole/L(gas)}} \right) = \frac{R * T \left( \frac{\text{l * atm * K}}{\text{mole * K}} \right) * 55.6 \left( \frac{\text{mole H}_2\text{O}}{\text{L H}_2\text{O}} \right)}{K_H(\text{atm})} \quad (\text{B2})$$

where,  $K_{H,T}$  is the dimensionless Henry's constant, R is the gas constant (0.08205 L-atm/mole-K), T is the temperature in degrees Kelvin, 55.6 is the molar concentration of water, and  $K_H$  is Henry's constant [atm] at temperature T [K].<sup>4</sup>

## B3. Tracer Test: Model

The mass balance on the barrier region is

$$V_1 \frac{dC_1}{dt} = QC_{H2O} - QC_1 \quad (\text{B3})$$

where,  $V_1$  is the volume of the barrier area of the RBC,

$C_1$  is the concentration of the tracer in the barrier region and its effluent over time,

t is time, since the injection,

Q is the flowrate, and

$C_{H2O}$  is the concentration of the tracer in the influent water, which is zero.

The mass balance on the first chamber of the RBC is

$$V_2 \frac{dC_2}{dt} = QC_1 - QC_2 \quad (B4)$$

where,  $V_2$  is the volume of the first chamber of the RBC, and

$C_2$  is the concentration of the tracer in the first chamber and its effluent over time.

The mass balance on the second chamber (which has the same volume as the first chamber,  $V_2$  is

$$V_2 \frac{dC_3}{dt} = QC_2 - QC_3 \quad (B5)$$

where,  $V_2$  is the volume of the second chamber, and

$C_3$  is the concentration of the tracer in the second chamber and its effluent over time

The mass balance on the third chamber is

$$V_3 \frac{dC_4}{dt} = QC_3 - QC_4 \quad (B6)$$

where,  $V_3$  is the volume of the third chamber, and

$C_4$  is the concentration of the tracer in the third chamber over time

The differential equations (Eq (1)–Eq (4)) were integrated, and rearranged to solve for the concentration of conservative tracer in each of the reactors and their effluents (assuming completely mixed conditions).

Unlike the familiar model for CMFRs in series with equal volumes, the mathematics do not simplify to a simple expression.

The concentration of tracer in the barrier chamber and its effluent can be modeled as:

$$C_1 = C_0 e^{\frac{-t}{\theta_1}} \quad (B7)$$

where,  $C_0$  is the concentration in the barrier area immediately after of the injection of the tracer,

assuming completely mixed conditions, and

$\theta_1$  is the hydraulic retention time of barrier area.

The concentration of tracer over time in the first chamber of the RBC,  $C_2$ , can be modeled as:

$$C_2 = \frac{C_0}{1 - \frac{\theta_2}{\theta_1}} \left( e^{\frac{-t}{\theta_1}} - e^{\frac{-t}{\theta_2}} \right) \quad (B8)$$

where,  $\theta_2$  is the hydraulic retention time in the first chamber.

The concentration of tracer over time in the second chamber,  $C_3$ , can be modeled as:

$$C_3 = \frac{C_0}{\left(1 - \frac{\theta_2}{\theta_1}\right)^2} \left( e^{\frac{-t}{\theta_1}} - e^{\frac{-t}{\theta_2}} \right) - \frac{C_0}{\theta_2 \left(1 - \frac{\theta_2}{\theta_1}\right)} \left( t e^{\frac{-t}{\theta_2}} \right) \quad (B9)$$

where,  $\theta_2$  is the hydraulic retention time in the second chamber.

The concentration of tracer over time in the third chamber,  $C_4$ , can be modeled as:

$$C_4 = C_0 * \left( \frac{1}{\left(1 - \frac{\theta_2}{\theta_1}\right)^2 \left(1 - \frac{\theta_3}{\theta_1}\right)} e^{\frac{-t}{\theta_1}} - \frac{1}{\left(1 - \frac{\theta_2}{\theta_1}\right)^2 \left(1 - \frac{\theta_3}{\theta_2}\right)} e^{\frac{-t}{\theta_2}} - \frac{1}{\theta_2 \left(1 - \frac{\theta_2}{\theta_1}\right) \left(1 - \frac{\theta_3}{\theta_2}\right)} \left( t e^{\frac{-t}{\theta_2}} \right) + \frac{1}{\left(\frac{\theta_2}{\theta_3}\right) \left(1 - \frac{\theta_2}{\theta_1}\right)} e^{\frac{-t}{\theta_4}} \left( \frac{1}{\left(1 - \frac{\theta_2}{\theta_1}\right)^2 \left(1 - \frac{\theta_3}{\theta_2}\right)} - \frac{1}{\left(1 - \frac{\theta_2}{\theta_1}\right)^2 \left(1 - \frac{\theta_3}{\theta_1}\right)} - \frac{1}{\frac{\theta_2}{\theta_3} * \left(1 - \frac{\theta_2}{\theta_1}\right) \left(1 - \frac{\theta_3}{\theta_2}\right)^2} \right) \right) \quad (B10)$$

where,  $\theta_3$  is the hydraulic retention time in the third chamber.

## C. Engineering Process Model

### C1. Process flow of Model Scenarios

The following process flow diagrams were created in CapdetWorks.

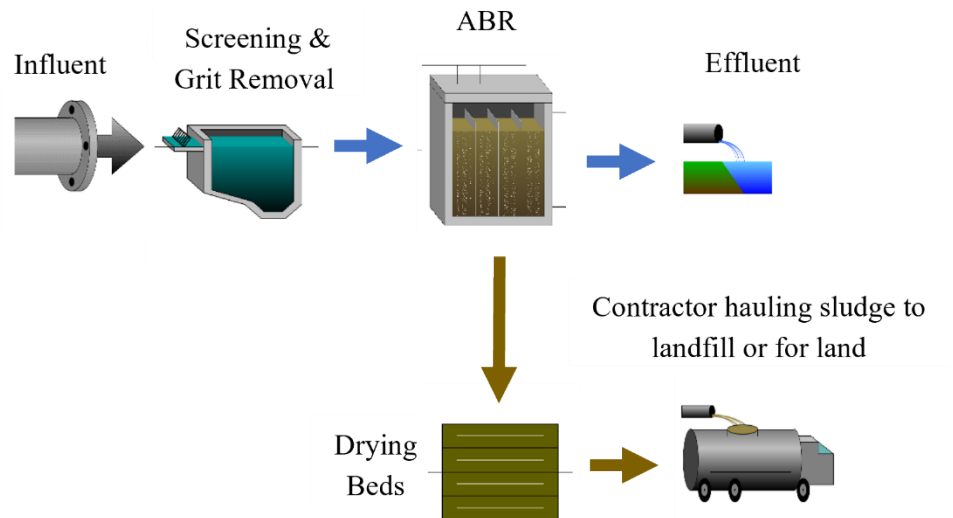

Figure C.1 Process flow for the anaerobic treatment scenario, using an ABR.

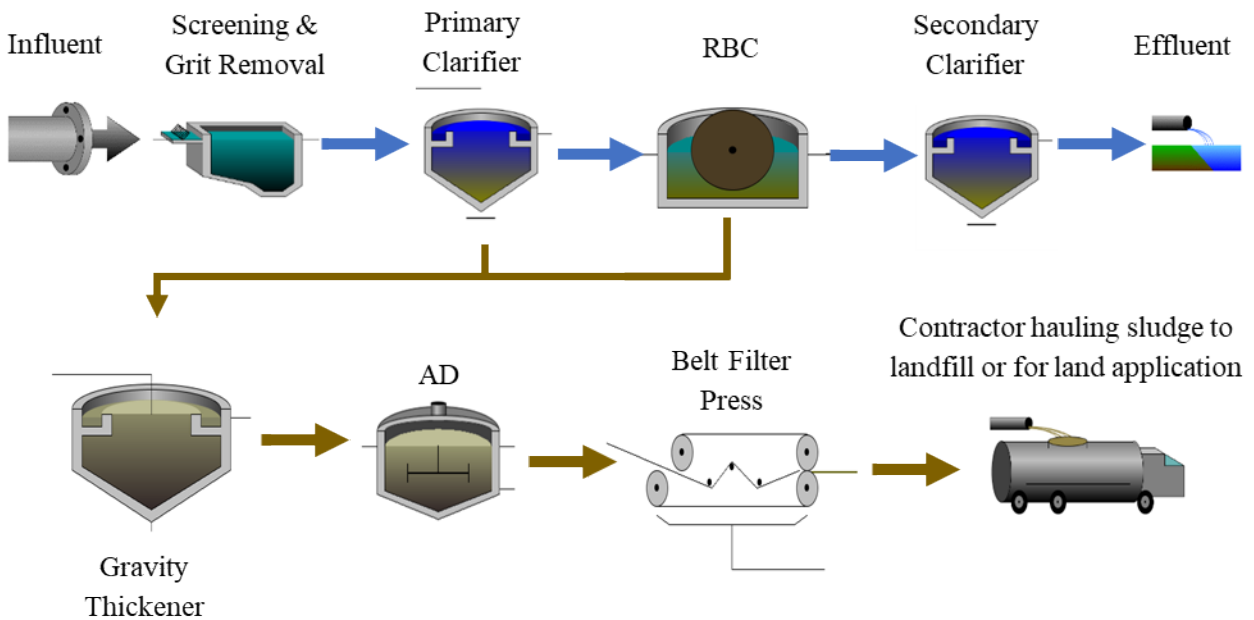

Figure C.2 Process flow for the aerobic treatment scenario, using an RBC+AD.

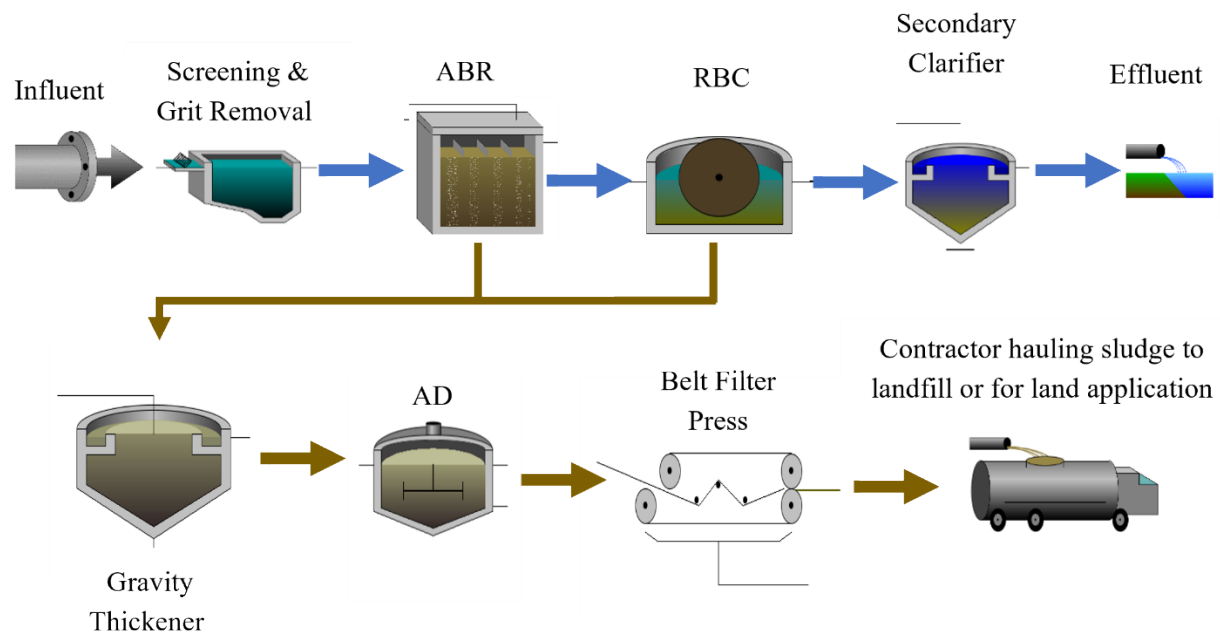

Figure C.3 Process flow for the anaerobic followed by aerobic treatment scenario, using an ABR+RBC+AD.

## C2. Building the Process Engineering Models

Table C.1 Influent wastewater characteristics (value  $\pm$  standard deviation) used for the modeling framework, from the Milton Regional Sewer Authority (MRSA) Milton, PA.<sup>5</sup>

| Design Criteria   | Units | Value $\pm$ SD |
|-------------------|-------|----------------|
| Average flow      | MGD   | 2              |
| TSS               | mg/L  | 171 $\pm$ 132  |
| VSS               | mg/L  | 147 $\pm$ 103  |
| BOD <sub>5</sub>  | mg/L  | 241 $\pm$ 99   |
| SBOD <sub>5</sub> | mg/L  | 92 $\pm$ 30    |
| COD               | mg/L  | 531 $\pm$ 217  |
| SCOD              | mg/L  | 203 $\pm$ 66   |

Table C.2 Life cycle inventory for 15–20°C treatment for 2 MGD of domestic wastewater (base case values).

| Process                            | Parameter                                                           | Unit              | ABR                    | RBC              | ABR+RBC           |
|------------------------------------|---------------------------------------------------------------------|-------------------|------------------------|------------------|-------------------|
| ABR                                | Effluent COD                                                        | mg/L              | 90 <sup>5</sup>        | -                | 90 <sup>5</sup>   |
|                                    | Effluent dissolved CH <sub>4</sub>                                  | mg/L              | 27 <sup>5</sup>        | -                | 27 <sup>5</sup>   |
|                                    | Effluent dissolved CH <sub>4</sub> as COD                           | mg/L              | 108 <sup>5</sup>       | -                | 108 <sup>5</sup>  |
|                                    | Gaseous CH <sub>4</sub> production                                  | m <sup>3</sup> /d | 547                    | -                | 547; <sup>5</sup> |
| RBC                                | Influent COD                                                        | mg/L              | -                      | 255 <sup>†</sup> | 90 <sup>5</sup>   |
|                                    | Influent Dissolved CH <sub>4</sub> as COD                           | mg/L              | -                      | -                | 108 <sup>5</sup>  |
|                                    | Electricity                                                         | kWh/d             | -                      | 396              | 337               |
|                                    | Effluent BOD5                                                       | mg/L              | -                      | 30               | 30                |
| Anaerobic digestion                | Mixing, electricity                                                 | kWh/d             | -                      | 48               | 24                |
|                                    | Heat losses                                                         | MJ/d              | -                      | 3.57 E+02        | 2.57 E+02         |
|                                    | Heat consumed                                                       | MJ/d              | -                      | 1.78 E+03        | 8.92 E+02         |
|                                    | Gaseous CH <sub>4</sub> production                                  | m <sup>3</sup> /d | -                      | 350              | 176               |
|                                    | Construction, AD plant for sewage sludge                            | piece             | -                      | 5.61 E-02        | 1.74 E-02         |
| Cogeneration                       | Electricity generated                                               | kWh/d             | 1.33 E+03              | 8.67 E+02        | 1.75 E+03         |
|                                    | Heat generated                                                      | MJ/d              | 7.04 E+03              | 4.81 E+03        | 9.39 E+03         |
|                                    | Construction, heat and power cogeneration unit, 160 kW <sub>e</sub> | piece/d           | 3.12 E-05              | 2.06 E-05        | 3.12 E-05         |
| Dewatering, sludge drying bed      | Land occupation                                                     | m <sup>2</sup>    | 741 <sup>5</sup>       | -                | -                 |
|                                    | Sand                                                                | kg                | 1.82 E+04 <sup>5</sup> | -                | -                 |
|                                    | Gravel                                                              | kg                | 3.81 E+05 <sup>5</sup> | -                | -                 |
| Dewatering, belt filter            | Electricity                                                         | kWh/d             | -                      | 71               | 43                |
|                                    | Acrylonitrile (polymer)                                             | kg/d              | -                      | 8.0              | 4.9               |
| Sludge disposal (landfill)         | Solid waste treated, sanitary landfill (TS)                         | kg/d              | 111                    | 390              | 266               |
|                                    | Sludge transport, freight, lorry                                    | kg*km/d           | 1.13 E+04              | 3.92 E+04        | 2.66 E+04         |
| Sludge disposal (land application) | Nitrogen fertilizer avoided                                         | kg/d              | 2.5                    | 8.5              | 5.8               |
|                                    | Phosphorus fertilizer avoided                                       | kg/d              | 2                      | 6.8              | 4.7               |
|                                    | Quicklime                                                           | kg/d              | 28                     | 96               | 65                |
|                                    | Electricity, consumed                                               | kWh/d             | 8.1                    | 47               | 29                |
|                                    | Diesel, from crude oil, consumption mix                             | kg/d              | 0.1                    | 0.58             | 0.36              |
|                                    | Solids for land application                                         | kg/d              | 136                    | 477              | 325               |
|                                    | Sludge transport, freight, lorry                                    | kg*km/d           | 6.88 E+03              | 2.37 E+04        | 1.61 E+04         |

<sup>†</sup> Estimated from Primary effluent at MRSA.

### C3. Normalization Factors

Table C.3 Factors used for normalization of damage category impacts (adapted from Lautier et al., 2010).<sup>6</sup>

|                    | United States | Europe  | Units            |
|--------------------|---------------|---------|------------------|
| Resource Depletion | 203,000       | 152,000 | MJ Primary/Point |
| Human Health       | 0.0388        | 0.0071  | DALY/Point       |
| Ecosystem Quality  | 4,380         | 13,700  | PDF-m2-yr/Point  |
| Climate Change     | 20,600        | 9,950   | kg CO2-eq/Point  |

### C4. Uncertainty Analysis

Table C.4 Base Case (Most Likely), Minimum (or Standard Deviation for Normal and Lognormal Distributions), and Maximum Values and Distribution Types Used for Uncertainty Analysis

| Component                      | Input Parameter                           | Value  | Units                                    | Distribution | SD             | min     | max     |
|--------------------------------|-------------------------------------------|--------|------------------------------------------|--------------|----------------|---------|---------|
| ABR                            | Specific CH <sub>4</sub> Production (gas) | 0.17   | L/g CODr                                 | Lognormal    | 2 <sup>‡</sup> |         |         |
|                                | Total Solids                              | 252    | mg/L                                     | Triangular   |                | 90      | 336     |
|                                | Volatile Solids Destroyed                 | 1060   | mg/L                                     | Triangular   |                | 318     | 3498    |
|                                | Effluent BOD5                             | 60     | mg/L                                     | Normal       | 36             |         |         |
|                                | Effluent COD                              | 90     | mg/L                                     | Normal       | 50             |         |         |
|                                | Influent COD                              | 531    | mg/L                                     | Normal       | 378            |         |         |
|                                | Dissolved CH <sub>4</sub>                 | 27     | mg/L                                     | Normal       | 6              |         |         |
|                                |                                           |        |                                          |              |                |         |         |
| RBC                            | Electricity Consumption                   | 140000 | kWh/year                                 | Triangular   |                | 112,000 | 168,000 |
| ABR+RBC                        | Electricity Consumption                   | 123000 | kWh/year                                 | Triangular   |                | 98,400  | 147,600 |
|                                | Dissolved CH <sub>4</sub> Removal         | 0.8    | %                                        | Triangular   |                | 0.64    | 0.96    |
|                                |                                           |        |                                          |              |                |         |         |
| Gravity Thickening             | Polymer Thickening                        | 0.005  | kg /kg of dry solids                     | Triangular   |                | 0.003   | 0.007   |
| Anaerobic Digestion            | VS destroyed                              | 56     | %                                        | Triangular   |                | 50      | 62      |
|                                | Biogas Yield                              | 0.94   | m <sup>3</sup> biogas/kg VS <sub>r</sub> | Triangular   |                | 0.75    | 1.12    |
|                                | CH <sub>4</sub> Content, biogas           | 65     | %                                        | Triangular   |                | 60      | 70      |
|                                |                                           |        |                                          |              |                |         |         |
|                                | Power, mixing                             | 0.0065 | kW/m <sup>3</sup> digester               | Triangular   |                | 0.005   | 0.008   |
| Combined Heat and Power System | Fugitive CH <sub>4</sub> emissions        | 3.1    | %                                        | Triangular   |                | 1.7     | 5.2     |
|                                | Electrical efficiency                     | 25     | %                                        | Uniform      |                | 24      | 31      |
| Sludge Disposal                | Disposed Solids ABR                       | 252    | kg/d                                     | Uniform      |                | 90      | 336     |
| Landfill                       | Transport Distance                        | 50     | km                                       | Triangular   |                | 10      | 160     |
| Land Application               | Transport distance                        | 50     | km                                       | Triangular   |                | 10      | 160     |

<sup>‡</sup> Geometric Standard deviation

## C5. Technoeconomic analysis

### **General Assumptions**

- Default values from the CapdetWorks <sup>7</sup> software package were used for building the engineering process models except for the parameters listed in Table C.4. The parameters listed in Table C.4 were adjusted based on experimental results from previous anaerobic experiments <sup>5,8</sup> and experimental results for methane oxidation in a rotating biological contactor (RBC) reported in this paper.
- Assumed life time to be 15 years for RBC units, 20 years for mechanical components, 25 years for pumps and 40 years for structural components.<sup>9</sup>
- Default assumptions in CapdetWorks:
  - o Nutrient removal was not modeled in any of the physical, biological or chemical processes. The only reduction in nutrients is due to anaerobic growth.
  - o Clarifiers were designed based on average flow rate.
- For screening and grit removal, the screening equipment was assumed to be cleaned manually (Wade, 2015).
- All systems were modeled to operate at 20<sup>0</sup> C, except for anaerobic digestion, which was operated at 35°C, and with a pH of 7.4 (Sills, 2016).
- Measured influent COD to SCOD ratio (Wade, 2015) was used for influent BOD to SBOD conversions.
- Anaerobic Baffled Reactor (ABR):
  - o ABR modeled as one UASB with an HRT of 0.55 days.<sup>8</sup>
- Percentage of TSS removal in Primary Clarifier was assumed to be 60%.<sup>10</sup>
- Fraction of VSS in TSS was assumed to be 0.725 for RBC and secondary clarifier effluents.<sup>11</sup>
- Anaerobic Digestion:
  - o One primary digester tank, and an additional digester tank to be operated during the cleaning of the primary tank.
  - o Sized the digester based on total volatile solids entering the digester from the gravity thickener.
- A check was conducted to ensure that a 1 m belt will be sufficient for Belt Filter Press following method from Tchobanoglous et al. (2003)
- Solids disposal:
  - o Sludge was stabilized by adding 200 kg of lime per ton of solids.<sup>8</sup>
  - o Two 12-ton dumpsters were purchased for the model. The dumpsters are to be filled in an alternating manner, so that when one is full and is trucked off site for disposal, the second can be filled.
  - o One dumpster was accounted for in the construction phase for landfill, and the second in the construction phase for land application.
  - o Dumpsters were changed every 30 years (CAPDETWorks Default for the truck).
  - o Transportation of sludge was contracted out to a trucking company based on information from MRSA.
- Combined heat and power (CHP)
  - o CHP was sized at 54.8, 36.6 and 73.8 kW for ABR, RBC and ABR+RBC respectively, based on methane production from ABR and AD.
- The combined treatment system (ABR+RBC) was modeled with experimental results for the ABR,<sup>8</sup> and included the dissolved methane in the ABR effluent as an influent for the RBC.

Table C.5 Input and design parameters used to model unit processes for the three treatment scenarios: ABR, RBC, ABR + RBC, with their respective distributions were applicable, or minimum and maximum values used (in parenthesis). Design parameters not listed used the CapdetWorks defaults. Grey shading was used when the assembly did not have the treatment unit (such as an ABR unit for the RBC+AD assembly).

| Unit Process       | Design Criteria                           | Units                                     | ABR                 | RBC+ AD             | ABR+RBC              |
|--------------------|-------------------------------------------|-------------------------------------------|---------------------|---------------------|----------------------|
| ABR                | HRT                                       | day                                       | 0.53 <sup>5</sup>   |                     | 0.53 <sup>5</sup>    |
|                    | Volume                                    | m <sup>3</sup>                            | 4013 <sup>8</sup>   |                     | 4013 <sup>8</sup>    |
|                    | Construction Multiplier                   | \$/m <sup>3</sup>                         | 219 <sup>¶</sup>    |                     | 219 <sup>8</sup>     |
|                    | Sludge Loading Rate                       | kg COD/ (kg VSS d)                        | 1 <sup>8</sup>      |                     | 1 <sup>8</sup>       |
|                    | COD Removal                               | %                                         | 0.95 <sup>8</sup>   |                     | 0.95 <sup>8</sup>    |
|                    | Specific CH <sub>4</sub> Production (gas) | L/g COD <sub>r</sub>                      | 0.17 <sup>5</sup>   |                     | 0.17 <sup>5</sup>    |
|                    | Influent Sulfate                          | mg/L                                      | 30 <sup>5</sup>     |                     | 30 <sup>5</sup>      |
|                    | Influent Solids Retention                 | %                                         | 0.955 <sup>8</sup>  |                     | 0.955 <sup>8</sup>   |
|                    | Yield of Acidogens                        |                                           | 0.16 <sup>5</sup>   |                     | 0.16 <sup>5</sup>    |
|                    | Yield of Methanogens                      |                                           | 0.035 <sup>5</sup>  |                     | 0.035 <sup>5</sup>   |
|                    | Yield of Sulphidogens                     |                                           | 0.057 <sup>5</sup>  |                     | 0.057 <sup>5</sup>   |
|                    | Sludge Flow                               | MGD                                       | 0.0104              |                     | 0.0362               |
| Primary Clarifier  | Side water depth                          | ft                                        |                     | 14 <sup>5</sup>     |                      |
|                    | Weir overflow rate                        | gal/(ft d)                                |                     | 12700 <sup>5</sup>  |                      |
|                    | Diameter                                  | ft                                        |                     | 50 <sup>5</sup>     |                      |
| RBC                | Number of stages                          | piece                                     |                     | 4                   | 4                    |
|                    | Media surface area                        | m <sup>2</sup>                            |                     | 49880 <sup>7</sup>  | 59180 <sup>7</sup>   |
|                    | Media surface area in first stage         | m <sup>2</sup>                            |                     | 27220 <sup>7</sup>  | 35580 <sup>7</sup>   |
|                    | Hydraulic Loading Rate                    | m <sup>3</sup> /(m <sup>2</sup> .day)     |                     | 0.13 <sup>7</sup>   | 0.15 <sup>7</sup>    |
|                    | Contactors underflow Solids               | mg/L                                      |                     | 100.4 <sup>7</sup>  | 105 <sup>7</sup>     |
|                    | Electricity consumption                   | kWh/year                                  |                     | 140000 <sup>7</sup> | 123000 <sup>7</sup>  |
|                    | Dissolved CH <sub>4</sub> Removal         | %                                         |                     |                     | 0.8                  |
| Gravity Thickening | Depth                                     | m                                         |                     |                     | 3.5 <sup>5</sup>     |
|                    | Mass loading                              | kg/(m <sup>2</sup> .hr)                   |                     |                     | 2.0 <sup>5</sup>     |
| Anaerobic Digester | Specific Gravity                          |                                           |                     |                     | 1.02 <sup>8</sup>    |
|                    | VS destroyed                              | %                                         |                     |                     | 56.0 <sup>10</sup>   |
|                    | Biogas Yield                              | m <sup>3</sup> biogas/ kg VS <sub>r</sub> |                     |                     | 0.94 <sup>10</sup>   |
|                    | CH <sub>4</sub> Content, biogas           | %                                         |                     |                     | 65 <sup>10</sup>     |
| CHP                | Power, mixing                             | kW/m <sup>3</sup> digester                |                     |                     | 0.0065 <sup>10</sup> |
|                    | Fugitive CH <sub>4</sub> Emissions        | %                                         |                     | 3.1 <sup>13</sup>   |                      |
| Belt Filter Press  | Electrical efficiency                     | %                                         |                     | 25 <sup>14</sup>    |                      |
|                    | Cake solids content                       | %                                         |                     |                     | 22 <sup>5</sup>      |
|                    | Hydraulic loading                         | L/s                                       |                     |                     | 2.3 <sup>5</sup>     |
| Drying Beds        | Polymer dose                              | % dry weight                              |                     |                     | 0.55 <sup>5</sup>    |
|                    | Depth applied                             | in                                        | 10 <sup>5</sup>     |                     |                      |
|                    | Time to drain                             | day                                       | 10 <sup>5</sup>     |                     |                      |
|                    | Final Solids                              | %                                         | 60 <sup>5</sup>     |                     |                      |
| Landfill           | Lime added                                | kg/ Ton of solids                         | 200 <sup>8,15</sup> |                     |                      |
|                    | Percent sludge disposed                   | %                                         |                     | 45 <sup>16</sup>    |                      |
|                    | Transport distance                        | km                                        |                     | 50 <sup>12</sup>    |                      |
| Land Application   | Percent sludge disposed                   | %                                         |                     | 55 <sup>16</sup>    |                      |
|                    | Transport distance                        | km                                        |                     | 50 <sup>12</sup>    |                      |

<sup>¶</sup>Construction multiplier calculated as: 1783 x Volume<sup>-0.2528</sup>

**Cost Assumptions used in in CapdetWorks:**

- This is a Class 4 estimate using parametric models and factoring in the pricing of equipment. The margins on this estimation are 15-30% on the lower end, and 20-50% on the higher end.<sup>17</sup>
- Used default values for unit costs, labor rates, chemical costs, cost indices and equipment costs.
- Used RS Means location factor adjustment of 0.97 for Harrisburg, PA.<sup>18</sup>
- Calculated land costs to be 6400 dollars per acre <sup>19</sup> using a year conversion index of 191.2 for 2011 and 222.9 for 2018.<sup>17</sup>
- Converted capital and operation costs from 2018 USD to 2022 USD by using inflation factor of 1.1343.<sup>20</sup>

Table C.6 Additional cost assumptions used for capital costs calculated in CapdetWorks as well as for combined heat and power system (Source: CapdetWorks).<sup>7</sup>

| <b>Additional Cost Assumptions</b> | <b>Value (%)</b> |
|------------------------------------|------------------|
| Engineering Design Fee             | 15               |
| Miscellaneous                      | 5                |
| Administration/Legal               | 2                |
| Inspection                         | 2                |
| Contingency                        | 10               |
| Technical                          | 2                |
| Profit and Overhead                | 15               |

## D. Supplementary Results

### D1. Recipe H Midpoints

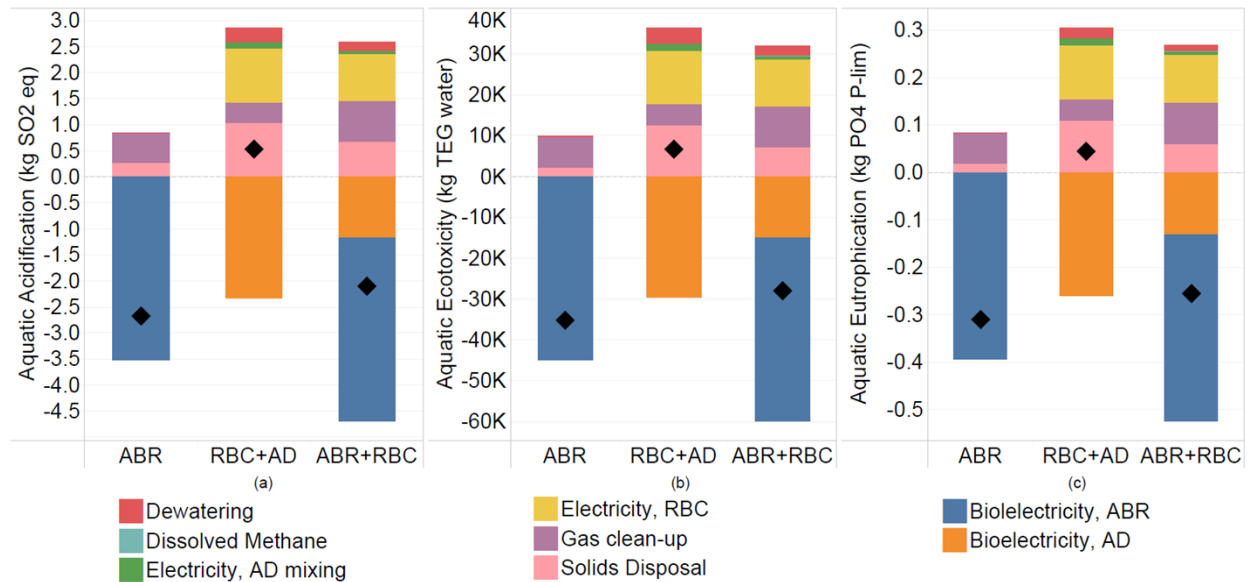

Figure D.1 Base case environmental impact for ReCiPe midpoint (H) categories (a) Aquatic acidification (kg SO<sub>2</sub> eq.), (b) Aquatic ecotoxicity (kg TEG water), and (c) Aquatic eutrophication (kg PO<sub>4</sub> P-lim) for three treatment scenarios: ABR, RBC+AD and ABR+RBC. Harmful impacts are represented by values with positive magnitudes, and beneficial impacts are represented by values with negative magnitudes. Net impacts are shown as black diamonds.

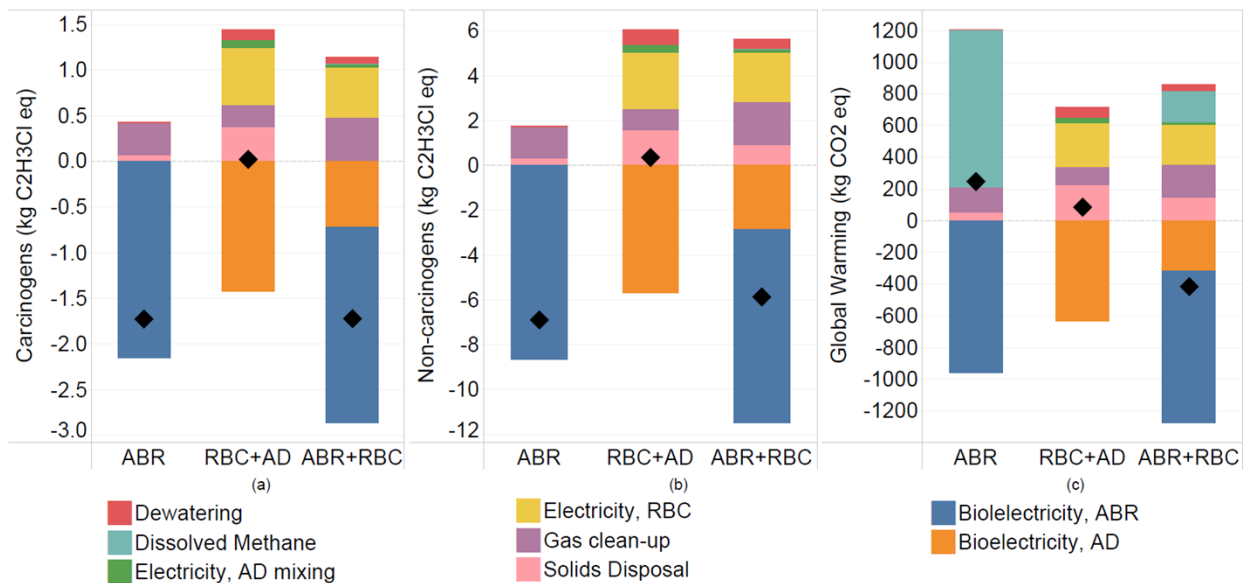

Figure D.2 Base case environmental impact for ReCiPe midpoint (H) categories (a) Carcinogens (kg C<sub>2</sub>H<sub>3</sub>Cl eq.), (b) Non-carcinogens (kg C<sub>2</sub>H<sub>3</sub>Cl eq.), and (c) Global Warming (kg CO<sub>2</sub> eq.) for three treatment scenarios: ABR, RBC+AD and ABR+RBC. Harmful impacts are represented by values with positive magnitudes, and beneficial impacts are represented by values with negative magnitudes. Net impacts are shown as black diamonds.

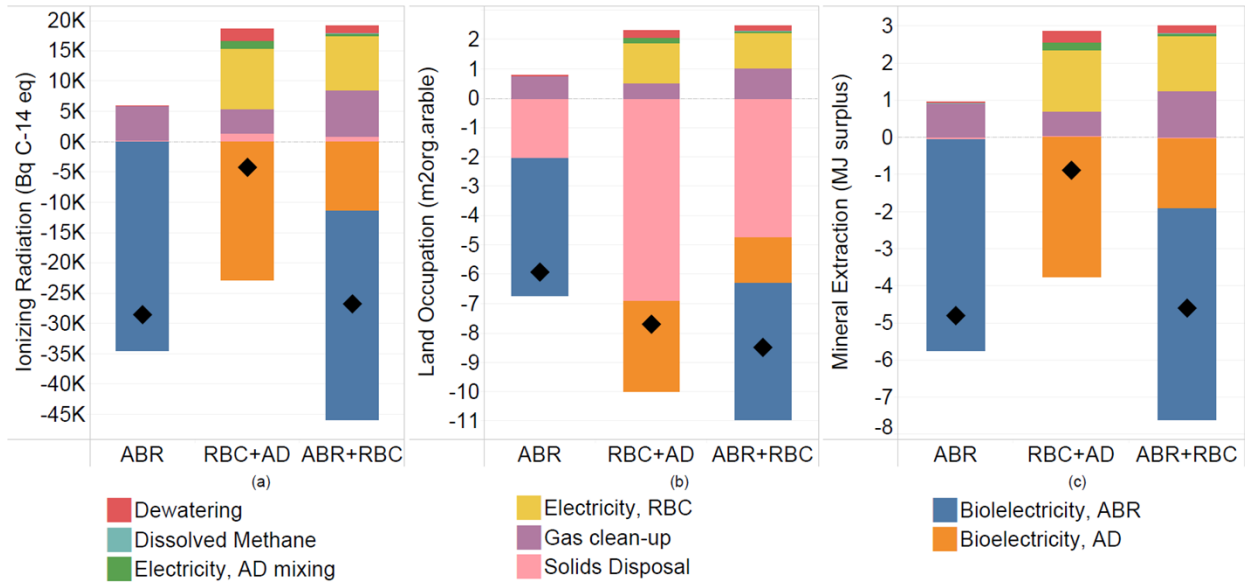

Figure D.3 Base case environmental impact for ReCiPe midpoint (H) categories (a) Ionizing radiation (Bq C-14 eq.), (b) Land occupation (m²org.arable), and (c) Mineral extraction (MJ surplus) for three treatment scenarios: ABR, RBC+AD and ABR+RBC. Harmful impacts are represented by values with positive magnitudes, and beneficial impacts are represented by values with negative magnitudes. Net impacts are shown as black diamonds.

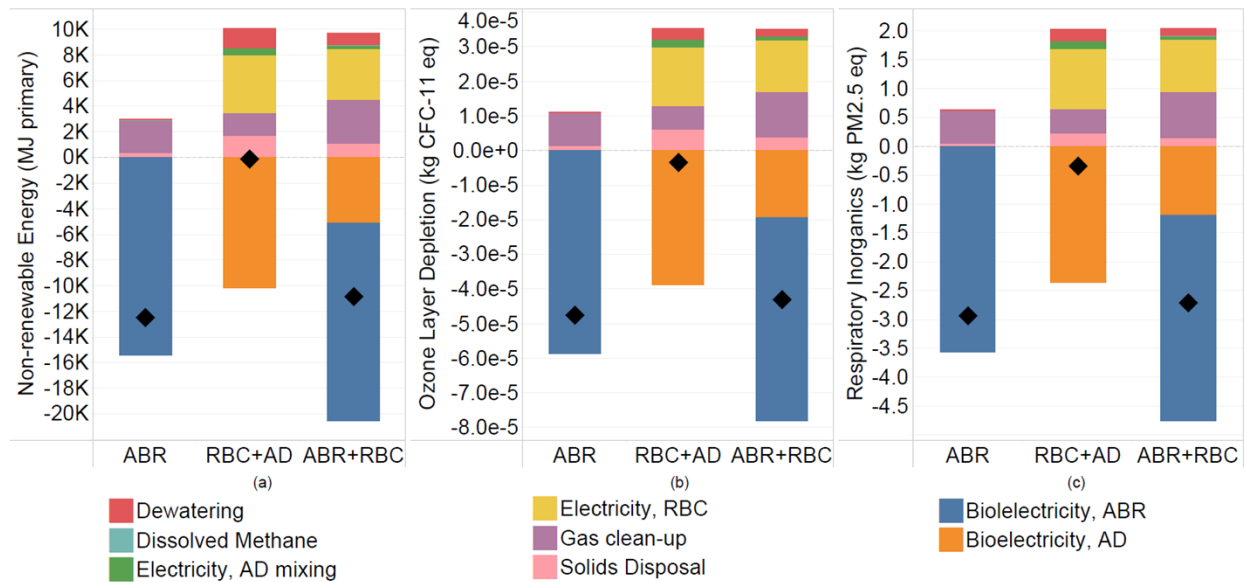

Figure D.4 Base case environmental impact for ReCiPe midpoint (H) categories (a) Non-renewable energy (MJ primary), (b) Ozone layer depletion (kg CFC-11 eq.), and (c) Respiratory inorganics (kg PM<sub>2.5</sub> eq.) for three treatment scenarios: ABR, RBC+AD and ABR+RBC. Harmful impacts are represented by values with positive magnitudes, and beneficial impacts are represented by values with negative magnitudes. Net impacts are shown as black diamonds.

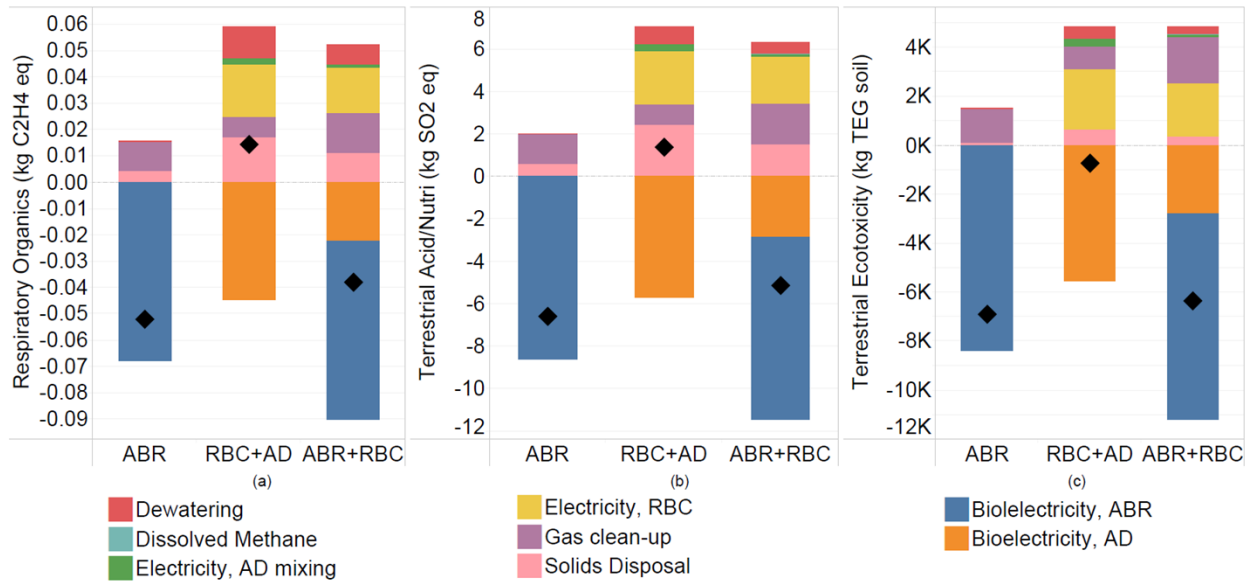

Figure D.5 Base case environmental impact for ReCiPe midpoint (H) categories (a) Respiratory Organics (kg C<sub>2</sub>H<sub>4</sub> eq.), (b) Terrestrial Acidification/Nutrient (kg SO<sub>2</sub> eq.) and (c) Terrestrial ecotoxicity (kg TEG soil) for three treatment scenarios: ABR, RBC+AD and ABR+RBC. Harmful impacts are represented by values with positive magnitudes, and beneficial impacts are represented by values with negative magnitudes. Net impacts are shown as black diamonds.

## D2. Capital and Operating Costs

Table D.1 Capital costs in 2022 USD for three process assemblies designed to treat 2 MGD: anaerobic baffled reactor (ABR), rotating biological contactor (RBC) + anaerobic digestion (AD) and ABR+RBC.

| Process               | ABR              | RBC+AD            | ABR+RBC           |
|-----------------------|------------------|-------------------|-------------------|
| Preliminary Treatment | 279,038          | 279,038           | 279,038           |
| ABR                   | 1,361,160        | 0                 | 1,361,160         |
| Primary Clarification | 0                | 291,515           | 0                 |
| RBC                   | 0                | 973,229           | 851,859           |
| Secondary Clarifier   | 0                | 468,466           | 467,332           |
| Drying Beds           | 360,707          | 0                 | 0                 |
| Gravity Thickening    | 0                | 112,182           | 112,182           |
| Anaerobic Digestion   | 0                | 1,985,025         | 1,985,025         |
| Belt-Filter Press     | 0                | 921,052           | 921,052           |
| Aggregate Disposal    | 12,341           | 20,928            | 10,368            |
| Cogeneration          | 167,209          | 168,632           | 225,184           |
| Other Costs           | 7,685,087        | 9,528,120         | 10,221,456        |
| <b>Total</b>          | <b>9,865,542</b> | <b>14,748,187</b> | <b>16,434,655</b> |

Table D.2 Yearly operating costs in 2022 USD for three process assemblies designed to treat 2 MGD: anaerobic baffled reactor (ABR), rotating biological contactor (RBC) + anaerobic digestion (AD) and ABR+RBC.

| Process               | ABR            | RBC+AD         | ABR+RBC        |
|-----------------------|----------------|----------------|----------------|
| Preliminary Treatment | 71,744         | 71,971         | 72,312         |
| ABR                   | 189,893        | 0              | 191,027        |
| Primary Clarification | 0              | 60,643         | 0              |
| RBC                   | 0              | 50,646         | 44,408         |
| Secondary Clarifier   | 0              | 77,287         | 76,033         |
| Drying Beds           | 47,584         | 0              | 0              |
| Gravity Thickening    | 0              | 12,958         | 12,754         |
| Anaerobic Digestion   | 0              | 82,123         | 81,329         |
| Belt-Filter Press     | 0              | 6,395          | 6,383          |
| Aggregate Disposal    | 13,817         | 50,301         | 17,561         |
| Cogeneration          | -38,428        | -25,429        | -51,633        |
| Other Costs           | 193,965        | 193,965        | 19,397         |
| <b>Total</b>          | <b>478,576</b> | <b>580,863</b> | <b>644,139</b> |

## E. Bibliography

- 1 C. P. L. Grady, G. T. Daigger, N. G. Love and C. D. M. Filipe, *Biological Wastewater Treatment, Third Edition*, CRC Press, 2011.
- 2 M. Hatamoto, H. Yamamoto, T. Kindaichi, N. Ozaki and A. Ohashi, Biological oxidation of dissolved methane in effluents from anaerobic reactors using a down-flow hanging sponge reactor, *Water Res.*, 2010, **44**, 1409–1418.
- 3 M. Hatamoto, T. Miyauchi, T. Kindaichi, N. Ozaki and A. Ohashi, Dissolved methane oxidation and competition for oxygen in down-flow hanging sponge reactor for post-treatment of anaerobic wastewater treatment, *Bioresour. Technol.*, 2011, **102**, 10299–10304.
- 4 J. R. Mihelcic and J. B. Zimmerman, *Environmental Engineering: Fundamentals, Sustainability, Design*, Wiley, 2009.
- 5 D. L. Sills, V. L. Wade and T. D. DiStefano, Comparative Life Cycle and Technoeconomic Assessment for Energy Recovery from Dilute Wastewater, *Environ. Eng. Sci.*, 2016, **33**, 861–872.
- 6 A. Lautier, R. K. Rosenbaum, M. Margni, J. Bare, P.-O. Roy and L. Deschênes, Development of normalization factors for Canada and the United States and comparison with European factors, *Sci. Total Environ.*, 2010, **409**, 33–42.
- 7 Hydromantis ESS, Inc., *CapdetWorks - Preliminary Design and Costing Software*, Hydromantis Environmental Software Solutions, Inc., Hamilton, Canada, 2014.
- 8 V. Wade, Master's Thesis, Bucknell University, 2015.
- 9 A. R. Pfluger, J. L. Callahan, J. Stokes-Draut, D. F. Ramey, S. Gagen, L. A. Figueroa and J. Munakata-Marr, Lifecycle Comparison of Mainstream Anaerobic Baffled Reactor and Conventional Activated Sludge Systems for Domestic Wastewater Treatment, *Environ. Sci. Technol.*, 2018, **52**, 10500–105010.
- 10 G. Tchobanoglous, F. L. Burton and H. D. Stensel, *Wastewater Engineering: Treatment and Reuse*, McGraw-Hill Science/Engineering/Math, Blacklick, Ohio, U.S.A., 2003.
- 11 P. A. Vesilind, Ed., *Wastewater Treatment Plant Design*, IWA Publishing, 2003, vol. 2.
- 12 MRSA, 2019.
- 13 T. K. Flesch, R. L. Desjardins and D. Worth, Fugitive methane emissions from an agricultural biogas digester, *Biomass Bioenergy*, 2011, **35**, 3927–3935.
- 14 US EPA, *Biomass CHP Catalog of Technologies*, 2015.
- 15 A. L. Smith, L. B. Stadler, L. Cao, N. G. Love, L. Raskin and S. J. Skerlos, Navigating Wastewater Energy Recovery Strategies: A Life Cycle Comparison of Anaerobic Membrane Bioreactor and Conventional Treatment Systems with Anaerobic Digestion, *Environ. Sci. Technol.*, 2014, **48**, 5972–5981.
- 16 N. B. and R. A. NEBRA, *A National Biosolids Regulation, Quality, End use and Disposal Survey—Preliminary Report, April 14, 2007*, NEBRA (Northeast Biosolids and Residuals Association), 2007.
- 17 Department of Energy (DOE), *Cost Estimate Classification System - As Applied in Engineering, Procurement and Construction for the Process Industries*, AACE International, Washington, D.C., 2005.
- 18 P. Waier and A. Charest, *RSMeans Building Construction Cost Data 2013*, RS Means, Kingston, MA, 76th edn., 2018.
- 19 National Agriculture Statistic Service, *Land Values Methodology and Quality Measures*, United States Department of Agriculture (USDA), PA Office, 2011.
- 20 CPI Inflation Calculator, [https://www.bls.gov/data/inflation\\_calculator.htm](https://www.bls.gov/data/inflation_calculator.htm), (accessed 17 June 2022).
